# Supplementary material
Source: publisher site journal article supplement (https://www.dovepress.com/get_supplementary_file.php?f=431242.docx)
Supplement: Supplementary file 1 [file get_supplementary_file.php]

**Supplementary material 1**

**Epilepsy Treatment Outcome and its Predictors among Children who had Chronic follow up at Dessie Comprehensive Specialized Hospital**

Supplementary Material 1: Tools to assess epilepsy treatment outcome and its predictors among children who had chronic follow up at Dessie Comprehensive Specialized Hospital, Northeast EthiopiaDate_____________________/month_____________________/year___________________Name of data collector ________________signature _________questionnaire Code_______

**Part 1: Socio-demographic characteristics of pediatric patients with Epilepsy**

| S.NO | Variables | Response |
| --- | --- | --- |
| 1 | Age of the child | --------- |
| 2 | Sex of the child | 1. Male 2. Female |
| 3 | Place of residence | 1. Urban 2. Rural |
| 4 | Educational status of care giver | 1. Unable to read and write 2. Able to read and write 3. Primary school 4. Secondary school 5. College and above |
| 5 | Care giver occupational status | 1. Farmer 2. Government employee 3. Private employee 4. Daily labourer |
| 6 | Monthly income of the family | ------------- Ethiopian birr |

**Part 2: Clinical conditions of pediatric patients with Epilepsy**

| S.NO | Variables | Response |
| --- | --- | --- |
| 1 | Was there any time which the child has discontinued the AED? | 1. Yes 2. No |
| 2 | Adherence status to anti-epileptic medication | 1. Excellent adherence 2. Good adherence 3. Poor adherence |
| 3 | Age at onset of seizure in years | -------------- |
| 4 | Type of seizure during diagnosis | 1. Focal 2. General 3. unknown onset 4. Unclassified 5. Other (Specify) ------------ |
| 5 | Duration of seizure before initiation of treatment | --------- years |
| 6 | Duration after treatment started | --------- years |
| 7 | Cause of seizure from clinical presentation | 1. Idiopathic 2. post meningitis 3. Post traumatic 4. History of perinatal insult 5. Post stroke 6. Other (Specify) ------------ |
| 8 | History of status epilepticus at presentation or during follow up | 1. Yes 2. No |
| 9 | Presence of other comorbidity | 1. Yes 2. No |
| 10 | Family history of epilepsy | 1. Yes 2. No |
| 11 | History of head injury | 1. Yes 2. No |
| 12 | Frequency of seizure per month before initiation of treatment? | ------------- |
| 13 | Frequency of seizure per month after initiations of treatment? | ----------- |
| 14 | Status of Seizure control with treatment? | 1. Good 2. Poor |
| 15 | Is there any associated neurologic problem? | 1. Yes 2. No (if no skip question number 16) |
| 16 | If yes for question number 15, what is the type of neurologic problem? | 1. Motor weakness 2. Mental retardation 3. Hearing problem 4. Visual problem 5. Behavioral problem 6. Learning disabilities 7. Other (Specify) ------------ |
| 17 | Is there a triggering factor for seizure activity? | 1. Yes 2. No (if no skip question number 18) |
| 18 | If yes for question number 17, what is the type of triggering factor? | 1. Emotional stress 2. Sleep deprivation 3. Missing of medication 4. Noise 5. Other (Specify) ------------ |

**Part 3: Medical conditions of pediatric patients with Epilepsy**

| S.NO | Variables | Response |
| --- | --- | --- |
| 1 | Modes of therapy | 1. Mono-therapy 2. Dual therapy 3. Triple therapy |
| 2 | First anticonvulsant initiated | 1. Phenobarbiton 2. Phenytoin 3. Valproate 4. Carbamazepine 5. Other (Specify) ------------ |
| 3 | Is second anticonvulsant initiated? | 1. Yes 2. No (if no skip question number 4 and 5) |
| 4 | If yes for question number 3, what type of second anticonvulsant initiated? | 1. Phenobarbiton 2. Phenytoin 3. Valproate 4. Carbamazepine 5. Other (Specify) ------------ |
| 5 | If yes for question number 3, what was the reason for initiation of second anticonvulsant? | 1. Due to drug side effect of the first 2. Absence of drug in the pharmacy 3. High Cost 4. Poor control by the first drug 5. Unknown reason |
| 6 | Is third anticonvulsant initiated? | 1. Yes 2. No (if no skip question number 7 and 8) |
| 7 | If yes for question number 6, what type of third anticonvulsant initiated? | 1. Phenobarbiton 2. Phenytoin 3. Valproate 4. Carbamazepine 5. Other (Specify) ------------ |
| 8 | If yes for question number 6, what was the reason for initiation of third anticonvulsant? | 1. Due to drug side effect of the second 2. Absence of drugs 3. High Cost 4. Poor control by the second 5. Unknown reason |
| 9 | Does the patient has febrile illness | 1. Yes 2. No |
| 10 | Doe the patient has history of delayed mile stone | 1. Yes 2. No |
| 11 | Phase of therapy | 1. Maintenance phase 2. Escalation phase 3. Tapering phase |
| 12 | Is there a reported adverse effect of anti-epileptic drugs? | 1. Yes 2. No |
